# Supplementary material for: n-La2Ti2O7/p-LaCrO3: a novel heterojunction based composite photocatalyst with enhanced photoactivity towards hydrogen production
Source: Royal Society of Chemistry journal article supplement (doi:10.1039/c4ta02401j), 2014-10-01
Supplement: c4ta02401j1.pdf [file c4ta02401j1.pdf]

Supplementary information

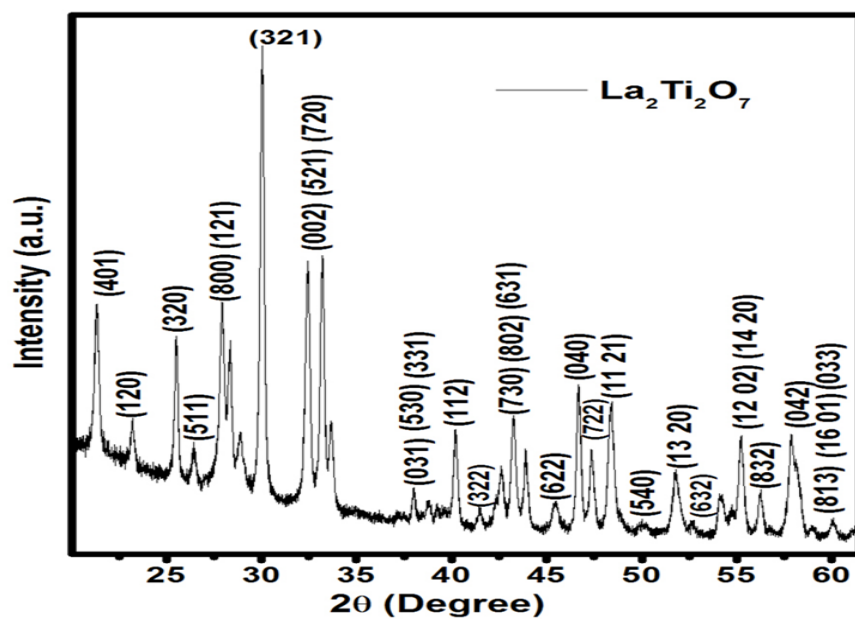

Figure S1 XRD patterns of  $\text{La}_2\text{Ti}_2\text{O}_7$  (reproduced from reference 13)
